# Supplementary material for: Ubiquitin-Regulated Nuclear-Cytoplasmic Trafficking of the Nipah Virus Matrix Protein Is Important for Viral Budding
Source: PubMed Central journal article supplement (PMC2978725; doi:10.1371/journal.ppat.1001186), 2010-11-11
Supplement: ppat.1001186.s003.pdf [file ppat.1001186.s003.pdf]

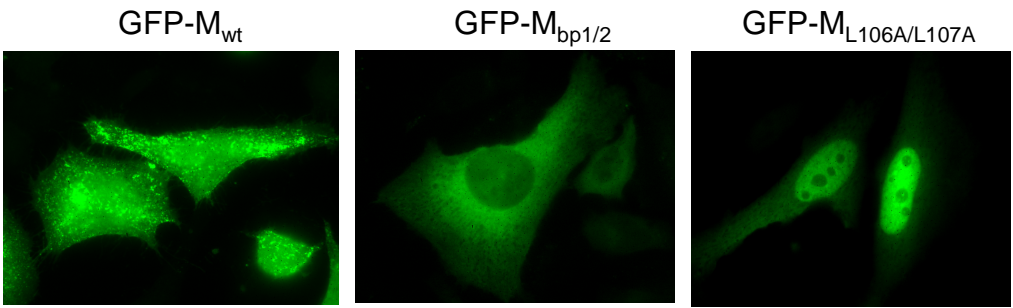

**Figure S3**
